# Supplementary material for: Zn-doped hydroxyapatite@g-C3N4: a novel efficient visible-light-driven photocatalyst for degradation of pharmaceutical pollutants
Source: Royal Society of Chemistry journal article supplement (doi:10.1039/d2nj04087e), 2022-01-01
Supplement: d2nj04087e1.pdf [file d2nj04087e1.pdf]

## Supplementary Information

### Zn-doped hydroxyapatite@g-C<sub>3</sub>N<sub>4</sub>: A novel efficient visible light driven photocatalyst for degradation of pharmaceutical pollutants

Juri Kalita<sup>a</sup>, Linkon Bharali<sup>a</sup>, Siddhartha S. Dhar<sup>\*a</sup>

a. Department of chemistry, National Institute of Technology, Silchar, Cachar, 788010, Assam, India  
Email id: [ssd@che.nits.ac.in](mailto:ssd@che.nits.ac.in)

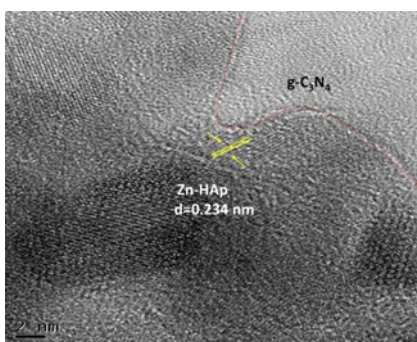

Fig. S1 HRTEM images of Zn-HAp@g-C<sub>3</sub>N<sub>4</sub> heterojunction

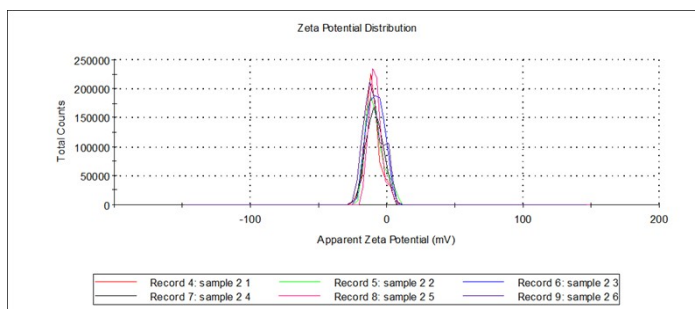

Fig S2 DLS measurement: Zeta potential distribution plot of Zn-HAp@g-C<sub>3</sub>N<sub>4</sub>

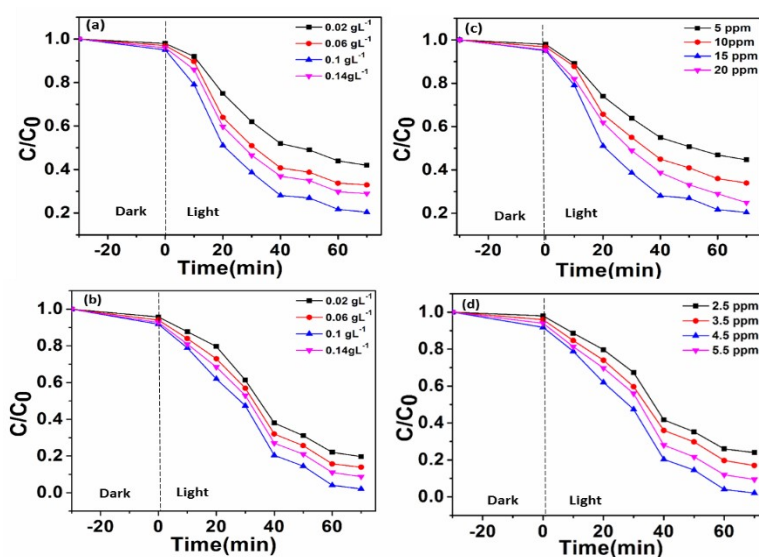

Catalyst characterization

Fig S3 The plot of  $C/C_0$  vs time at (a,b) different catalyst amount (c,d) different initial antibiotic concentrations of CIP and LEVO photodegradation respectively

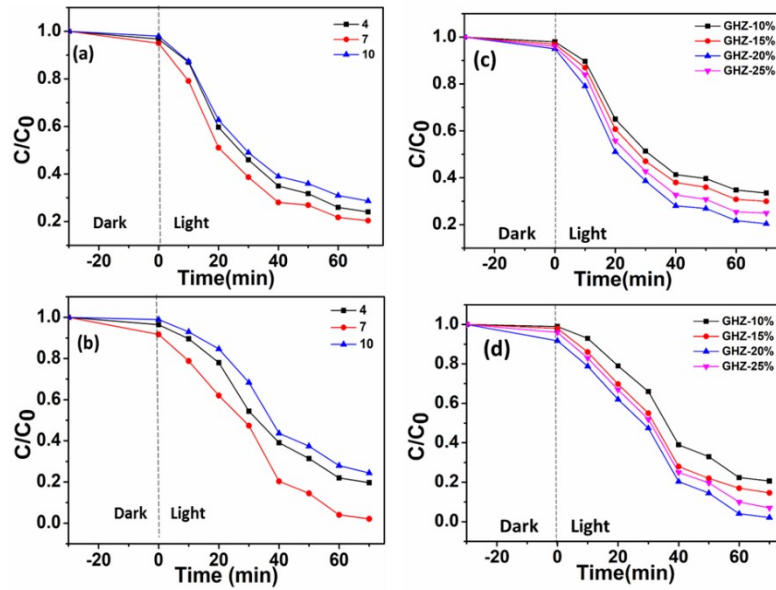

Fig S4 The plot of  $C/C_0$  vs time at (a, b) different pH and (c, d) different ratio of each component for photodegradation of CIP and LEVO solution respectively

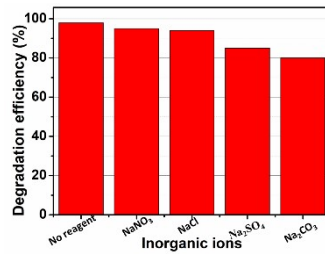

Fig S5 Effect of various inorganic anions on the Photo-degradation of antibiotics solution under visible light

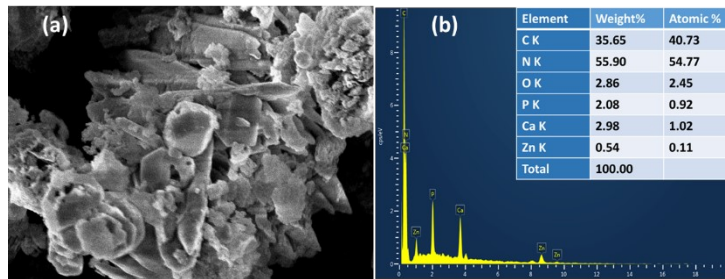

Fig. S6 (a) SEM image (b) EDS of reused catalyst

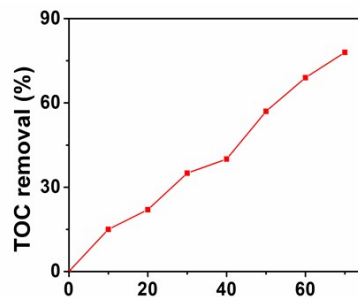

Fig S7 The TOC removal performance of Zn-HAp@g-C<sub>3</sub>N<sub>4</sub>

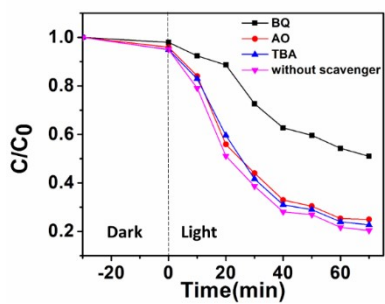

Fig. S8 Plot of  $C/C_0$  vs time with different scavengers

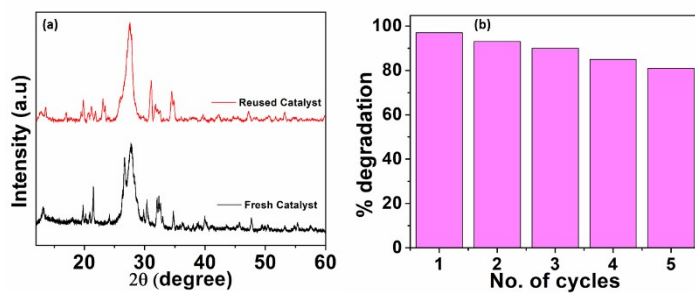

Fig S9 (a) XRD Spectra of fresh and reused catalyst (b) Reusability study of the catalyst.

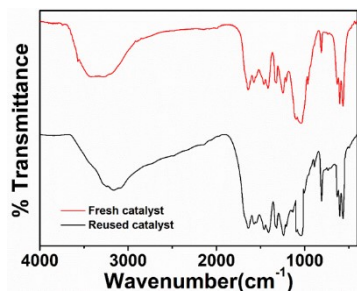

Fig S10 IR spectra of fresh and reused composite
